# Supplementary material
Source: publisher figshare collection journal article supplement (https://acs.figshare.com/ndownloader/files/4717498)
Supplement: Supplementary file 1 [file 4717498]

HEADER
REMARK Spartan `04 exported M001
HETATM    1  B   UNK  0001      -0.000   0.000   0.000
HETATM    2 Br   UNK  0001       1.899   0.000   0.000
HETATM    3 Br   UNK  0001      -0.949  -1.645   0.000
HETATM    4 Br   UNK  0001      -0.949   1.645   0.000
CONECT    1    2    3    4
CONECT    2    1
CONECT    3    1
CONECT    4    1
END
